# Supplementary material for: Cost-effectiveness of cervical cancer screening: cytology versus human papillomavirus DNA testing
Source: PubMed Central journal article supplement (PMC3489039; doi:10.1111/j.1471-0528.2011.03228.x), 2012-01-18
Supplement: bjo0119-0699-SD3.pdf [file bjo0119-0699-SD3.pdf]

**Table S2.** Undiscounted effects per 100,000 simulated women of the efficient screening programmes shown in Table S1. This table presents total effects, from 2011 onwards, for the remainder of the lives of the simulated women.

| Strategy <sup>1</sup> (type of primary test) | Number of screening rounds | Interval (years) | Age range | Primary screenings | Positive primary screenings | Triage screenings | False positive referrals | Screen-detected CIN 2 or CIN 3 lesions | Screen-detected cases of cancer | Clinically detected cases of cancer | Deaths from cervical cancer | Life years lost | QALYs lost |
|----------------------------------------------|----------------------------|------------------|-----------|--------------------|-----------------------------|-------------------|--------------------------|----------------------------------------|---------------------------------|-------------------------------------|-----------------------------|-----------------|------------|
| I (cytology)                                 | 3                          | 8                | 25-41     | 53,835             | 1,528                       | 1,191             | 75                       | 452                                    | 22                              | 393                                 | 208                         | 6,137           | 6,603      |
| I (cytology)                                 | 3                          | 5                | 32-42     | 68,094             | 1,866                       | 1,471             | 79                       | 526                                    | 25                              | 367                                 | 197                         | 5,848           | 6,298      |
| I (cytology)                                 | 3                          | 6                | 32-44     | 71,954             | 1,948                       | 1,543             | 81                       | 537                                    | 26                              | 363                                 | 194                         | 5,795           | 6,243      |
| C (HPV test)                                 | 3                          | 7                | 30-44     | 68,394             | 3,845                       | 10,104            | 132                      | 634                                    | 27                              | 339                                 | 182                         | 5,495           | 5,955      |
| C (HPV test)                                 | 3                          | 6                | 32-44     | 71,991             | 4,016                       | 10,599            | 138                      | 638                                    | 28                              | 334                                 | 181                         | 5,461           | 5,920      |
| E (HPV test)                                 | 4                          | 8                | 30-54     | 115,261            | 4,960                       | 9,214             | 1,603                    | 751                                    | 35                              | 306                                 | 162                         | 5,161           | 5,608      |
| D (HPV test)                                 | 5                          | 6                | 30-54     | 144,319            | 5,952                       | 11,082            | 142                      | 786                                    | 35                              | 297                                 | 160                         | 5,075           | 5,509      |
| E (HPV test)                                 | 5                          | 6                | 30-54     | 144,459            | 5,879                       | 10,976            | 1,926                    | 817                                    | 34                              | 290                                 | 156                         | 4,990           | 5,439      |
| D (HPV test)                                 | 6                          | 6                | 30-60     | 192,378            | 6,971                       | 13,017            | 168                      | 872                                    | 38                              | 277                                 | 148                         | 4,906           | 5,338      |
| D (HPV test)                                 | 7                          | 6                | 30-66     | 243,837            | 7,652                       | 14,281            | 184                      | 963                                    | 41                              | 255                                 | 135                         | 4,772           | 5,202      |
| D (HPV test)                                 | 9                          | 5                | 27-67     | 302,434            | 10,781                      | 20,387            | 265                      | 1,048                                  | 39                              | 239                                 | 127                         | 4,595           | 5,038      |
| D (HPV test)                                 | 10                         | 5                | 25-70     | 335,979            | 10,704                      | 20,180            | 263                      | 1,103                                  | 40                              | 229                                 | 121                         | 4,552           | 4,993      |
| A (cytology, current programme)              | 7                          | 5                | 30-60     | 224,535            | 4,968                       | 7,963             | 221                      | 860                                    | 39                              | 290                                 | 154                         | 5,075           | 5,546      |

<sup>1</sup>See Figure S1
