# Supplementary material for: Cost-effectiveness of cervical cancer screening: cytology versus human papillomavirus DNA testing
Source: PubMed Central journal article supplement (PMC3489039; doi:10.1111/j.1471-0528.2011.03228.x), 2012-01-18
Supplement: bjo0119-0699-SD4.pdf [file bjo0119-0699-SD4.pdf]

**Table S3.** Sensitivity analyses: efficient screening programmes with an incremental cost-effectiveness ratio (ICER) just below a €20,000 and a €50,000 per QALY cost-effectiveness threshold, in various situations. All results are per 100,000 simulated women, discounted using a 3% rate for costs and effects, except for the sensitivity analysis using differential discounting.

| Sensitivity analysis                                                                             | Cost-effectiveness threshold | Strategy (type of primary test) <sup>1</sup> | Number of screening rounds | Interval (years) | Age range | QALYs gained | Net costs (x 1000 euros) | ICER (euros per QALY gained) <sup>2</sup> |
|--------------------------------------------------------------------------------------------------|------------------------------|----------------------------------------------|----------------------------|------------------|-----------|--------------|--------------------------|-------------------------------------------|
| Base case                                                                                        | €20,000                      | C (HPV test)                                 | 3                          | 6                | 32-44     | 709          | 3,233                    | 10,300                                    |
|                                                                                                  | €50,000                      | D (HPV test)                                 | 7                          | 6                | 30-66     | 944          | 10,418                   | 46,566                                    |
| Life years gained                                                                                | €20,000                      | C (HPV test)                                 | 3                          | 6                | 32-44     | 691          | 3,233                    | 10,643                                    |
|                                                                                                  | €50,000                      | C (HPV test)                                 | 7                          | 6                | 30-66     | 943          | 10,666                   | 44,970                                    |
| No triage utility loss                                                                           | €20,000                      | C (HPV test)                                 | 3                          | 6                | 32-44     | 731          | 3,233                    | 9,721                                     |
|                                                                                                  | €50,000                      | C (HPV test)                                 | 7                          | 6                | 30-66     | 981          | 10,666                   | 46,022                                    |
| Two times higher triage utility loss                                                             | €20,000                      | D (HPV test)                                 | 4                          | 6                | 30-48     | 761          | 4,574                    | 19,674                                    |
|                                                                                                  | €50,000                      | D (HPV test)                                 | 7                          | 6                | 30-66     | 930          | 10,418                   | 47,620                                    |
| Three times higher triage utility loss                                                           | €20,000                      | I (cytology)                                 | 4                          | 5                | 32-47     | 707          | 3,597                    | 17,186                                    |
|                                                                                                  | €50,000                      | I (cytology)                                 | 9                          | 5                | 27-67     | 927          | 10,635                   | 49,662                                    |
| Lower attendance at triage tests (90% instead of 100%)                                           | €20,000                      | I (cytology)                                 | 5                          | 4                | 30-46     | 735          | 4,406                    | 18,769                                    |
|                                                                                                  | €50,000                      | I (cytology)                                 | 8                          | 4                | 30-58     | 887          | 9,109                    | 39,544                                    |
| Lower costs HPV test (€20 instead of €33.87)                                                     | €20,000                      | E (HPV test)                                 | 4                          | 8                | 30-54     | 806          | 4,099                    | 16,771                                    |
|                                                                                                  | €50,000                      | D (HPV test)                                 | 9                          | 5                | 27-67     | 995          | 10,636                   | 47,106                                    |
| Higher costs HPV test (€45 instead of €33.87)                                                    | €20,000                      | I (cytology)                                 | 4                          | 5                | 32-47     | 708          | 3,615                    | 13,901                                    |
|                                                                                                  | €50,000                      | I (cytology)                                 | 9                          | 5                | 27-67     | 926          | 10,583                   | 49,483                                    |
| Sensitivity of LBC 5% higher than of conventional cytology                                       | €20,000                      | D (HPV test) <sup>3</sup>                    | 3                          | 6                | 32-44     | 764          | 4,055                    | 8,990                                     |
|                                                                                                  | €50,000                      | D (HPV test) <sup>3</sup>                    | 7                          | 6                | 30-66     | 1,002        | 10,412                   | 46,299                                    |
| Equal risk in screening attenders and non-attenders (30% higher background cervical cancer risk) | €20,000                      | C (HPV test)                                 | 4                          | 8                | 32-56     | 1,061        | 4,822                    | 15,188                                    |
|                                                                                                  | €50,000                      | D (HPV test)                                 | 9                          | 5                | 27-67     | 1,304        | 12,598                   | 46,277                                    |
| Differential discounting (4% for costs, 1.5% for effects)                                        | €20,000                      | E (HPV test)                                 | 5                          | 6                | 30-54     | 1,506        | 6,523                    | 15,539                                    |
|                                                                                                  | €50,000                      | D (HPV test)                                 | 9                          | 5                | 27-67     | 1,731        | 12,256                   | 31,471                                    |
| Cytology screening below age 33 (strategy I), HPV screening for ages 33 and older                | €20,000                      | E (HPV test) <sup>5</sup>                    | 3                          | 6                | 32-44     | 778          | 2,981                    | 11,520                                    |
|                                                                                                  | €50,000                      | E (HPV test) <sup>5</sup>                    | 7                          | 5                | 27-57     | 992          | 9,297                    | 40,384                                    |

<sup>1</sup> See Figure S1.

<sup>2</sup> For the analysis with life years gained, the ICER is given per life year gained.

<sup>3</sup> LBC is used as the triage test after a primary HPV test.
